# Supplementary material
Source: Research Square preprint supplement (doi:10.21203/rs.3.rs-8900171/v1)

### **Supplementary Figure 1. Functional and pathway enrichment analysis of differentially expressed genes**

(A) The bubble chart displays the enrichment results of genes in the GO functional annotation and KEGG pathway databases. The results are grouped by category: biological processes, cellular components, molecular functions, and signaling pathways.

### **Supplementary Figure 2. Uncropped western blots for Figure 2B**

Full-length scans of membranes probed for mitochondrial apoptosis-related proteins in Figure 2B. Molecular weight markers (kDa) are indicated. Red boxes indicate cropped regions. Lanes: Marker = protein ladder; vehicle = control group; L-DIPH, M-DIPH, H-DIPH = cells treated with increasing concentrations of diphenhydramine. (A) c-Casp9 (A549), expected size: 35 kDa; (B) c-Casp9 (PC9), expected size: 35 kDa; (C) c-Casp3 (A549 and PC9), expected size: 17 kDa; (D) Cyt c (A549), expected size: 14 kDa; (E) Cyt c (PC9), expected size: 14 kDa; (F) BAX (A549), expected size: 20 kDa; (G) BAX (PC9), expected size: 20 kDa; (H) GAPDH (A549), expected size: 37 kDa; (I) GAPDH (PC9), expected size: 37 kDa.

### **Supplementary Figure 3. Uncropped western blots for Figure 2D**

Full-length scans of membranes probed for DNA damage response proteins in Figure 2D. Molecular weight markers (kDa) are indicated. Red boxes indicate cropped regions. Lanes: Marker = protein ladder; vehicle = control group; L-DIPH, M-DIPH, H-DIPH = cells treated with increasing concentrations of diphenhydramine. For p-ATM, HiMark™ Pre-stained Protein Standard (LC5699) was used; additional bands above 460 kDa are marker-related components. (A)  $\gamma$ -H2AX (A549), expected size: 15 kDa; (B)  $\gamma$ -H2AX (PC9), expected size: 15 kDa; (C) p-ATM (A549), expected size: 350 kDa; (D) p-ATM (PC9), expected size: 350 kDa; (E) p-CHK1 (A549), expected size: 56 kDa; (F) p-CHK1 (PC9), expected size: 56 kDa; (G) p-CHK2 (A549), expected size: 62 kDa; (H) p-CHK2 (PC9), expected size: 62 kDa; (I) GAPDH (A549), expected size: 37 kDa; (J) GAPDH (PC9), expected size: 37 kDa.

### **Supplementary Figure 4. Uncropped western blots for Figure 3B**

Full-length scans of membranes probed for antioxidant enzymes in Figure 3B. Molecular weight markers (kDa) are indicated. Red boxes indicate cropped regions. Lanes: Marker = protein ladder; vehicle = control group; L-DIPH, M-DIPH, H-DIPH = cells treated with increasing concentrations of diphenhydramine. (A) CAT (A549), expected size: 60 kDa; (B) CAT (PC9), expected size: 60 kDa; (C) SOD2 (A549), expected size: 25 kDa; (D) SOD2 (PC9), expected size: 25 kDa; (E) GAPDH (A549), expected size: 37 kDa; (F) GAPDH (PC9), expected size: 37 kDa.

# Supplementary Figure 1

A

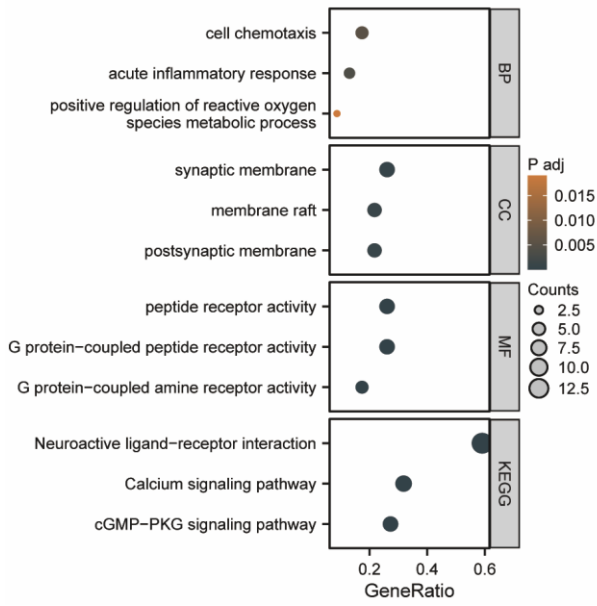

## Supplementary Figure 2

A

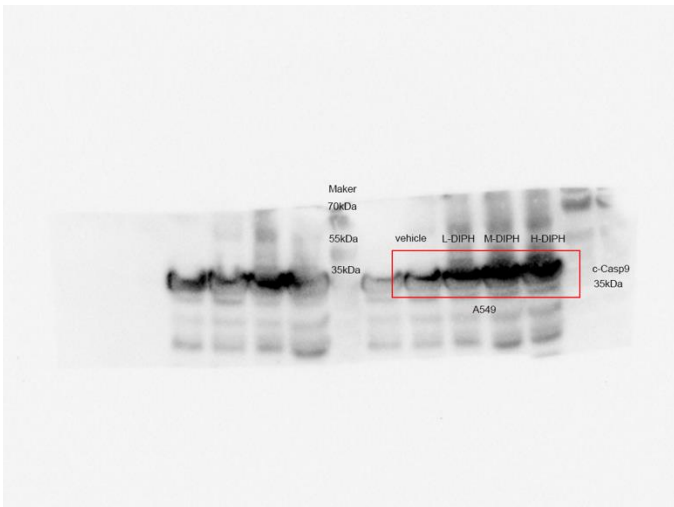

B

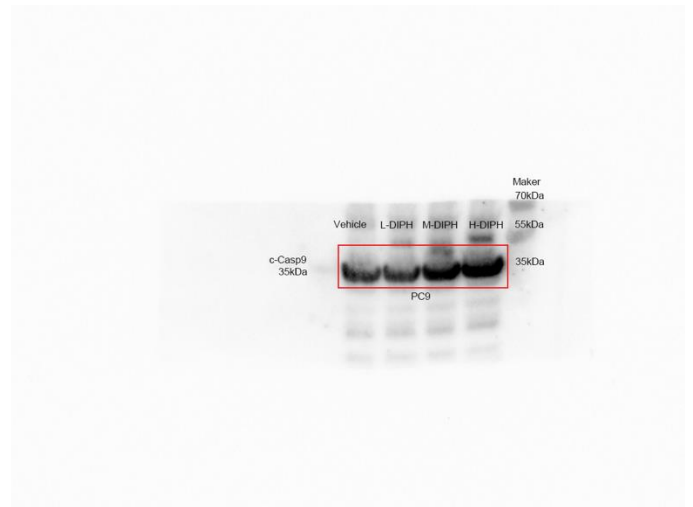

C

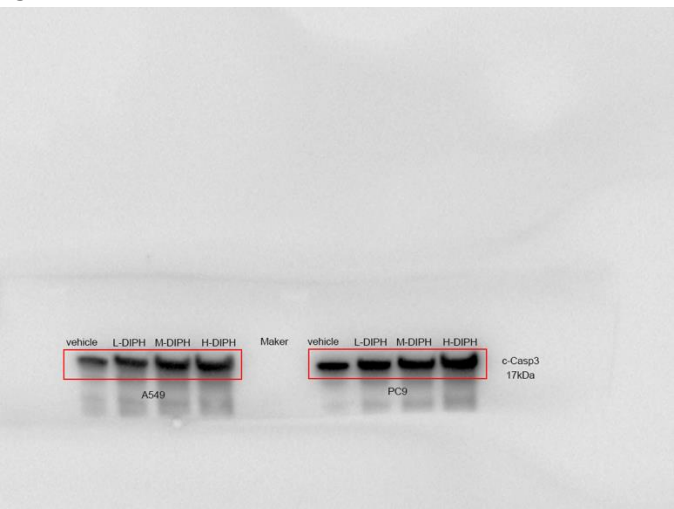

D

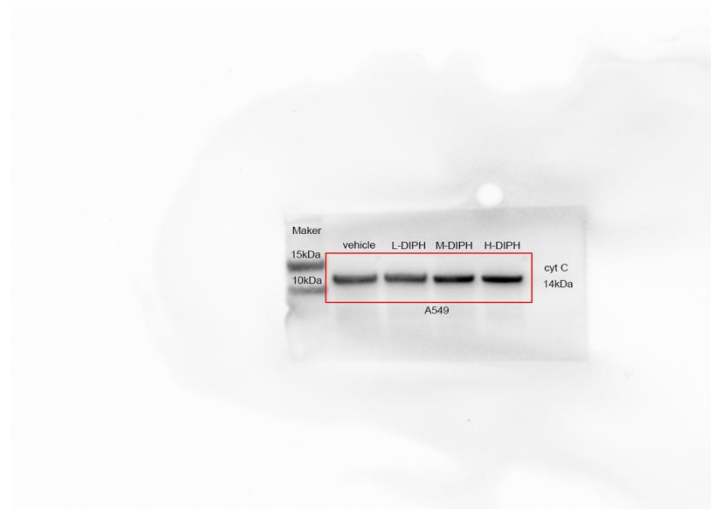

E

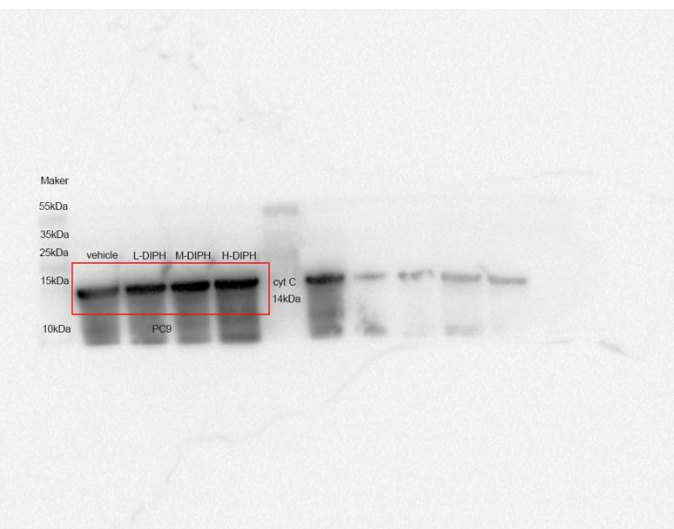

F

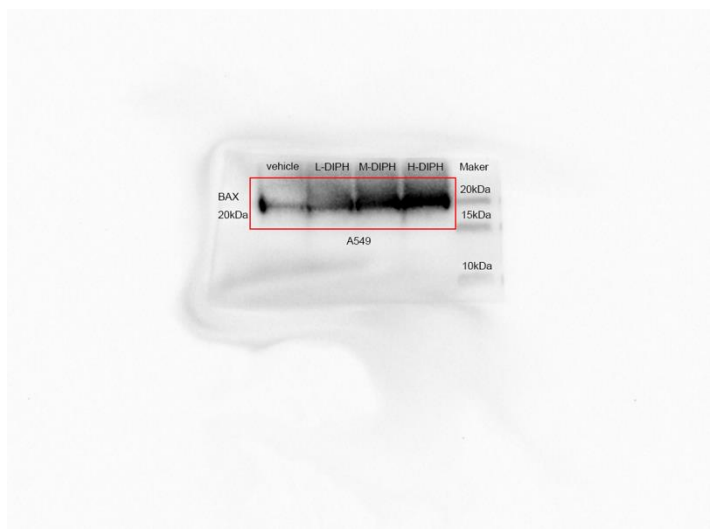

G

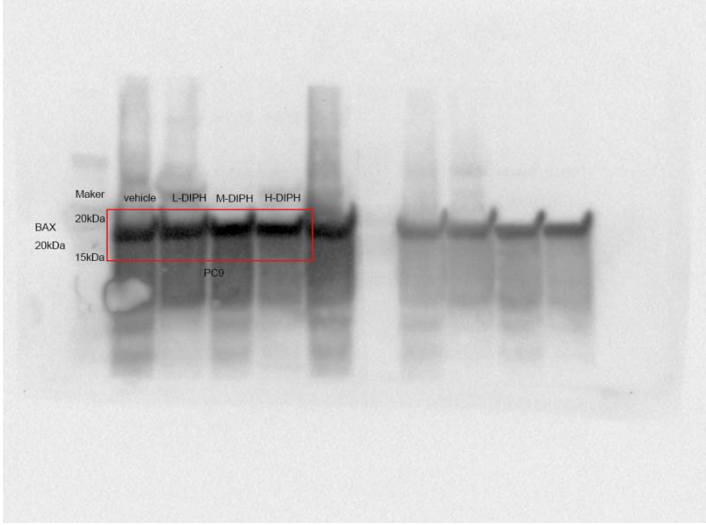

H

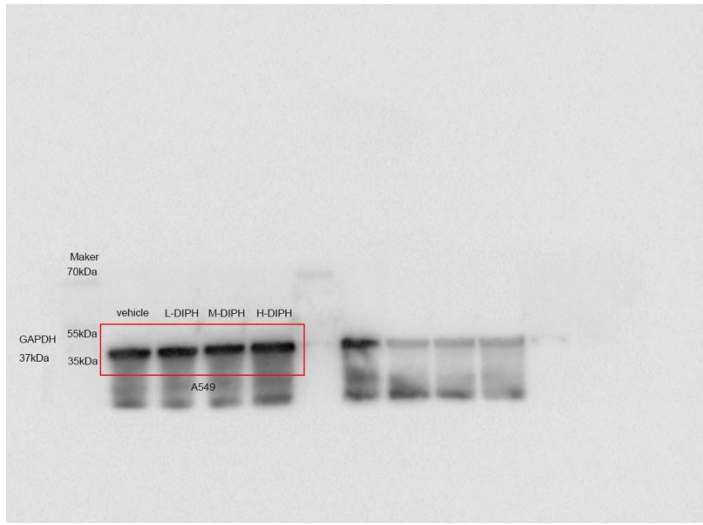

I

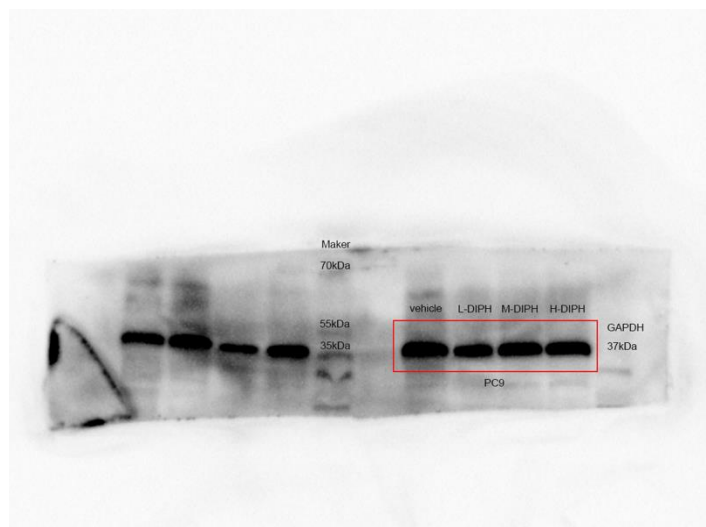

### Supplementary Figure 3

A

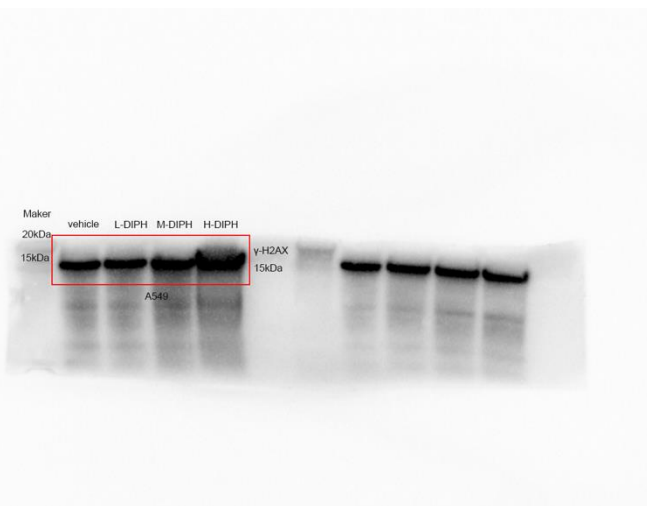

B

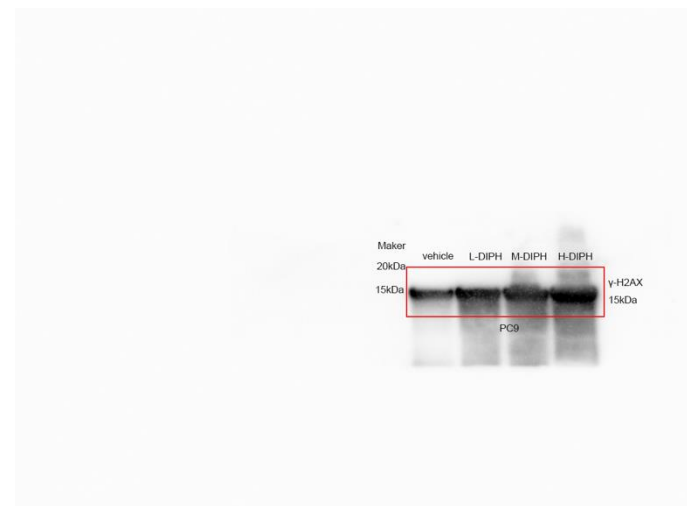

C

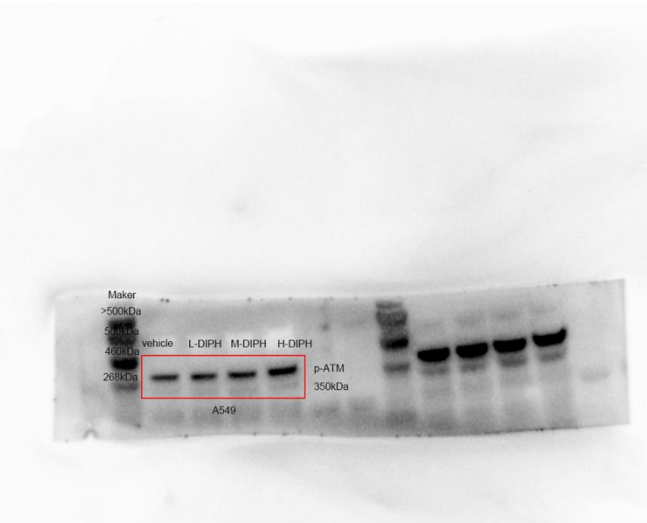

D

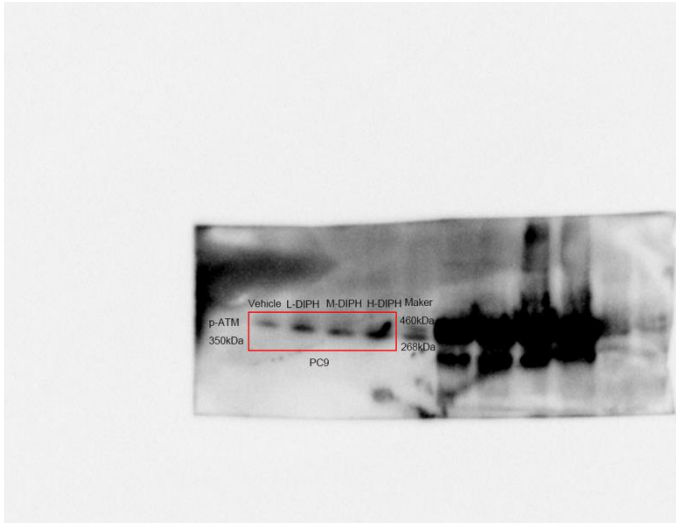

E

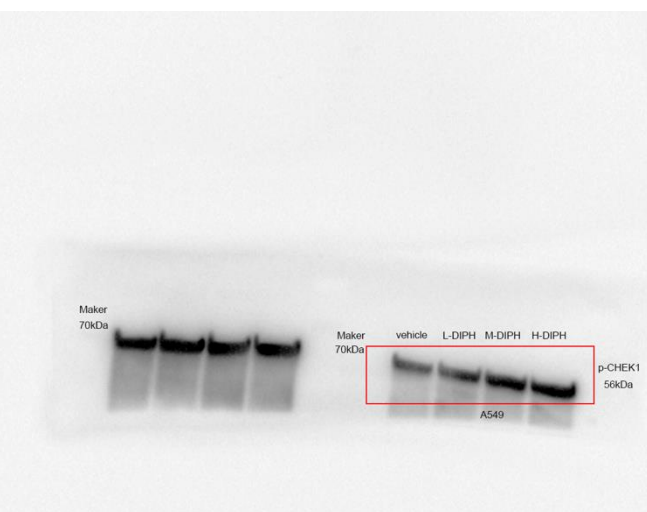

F

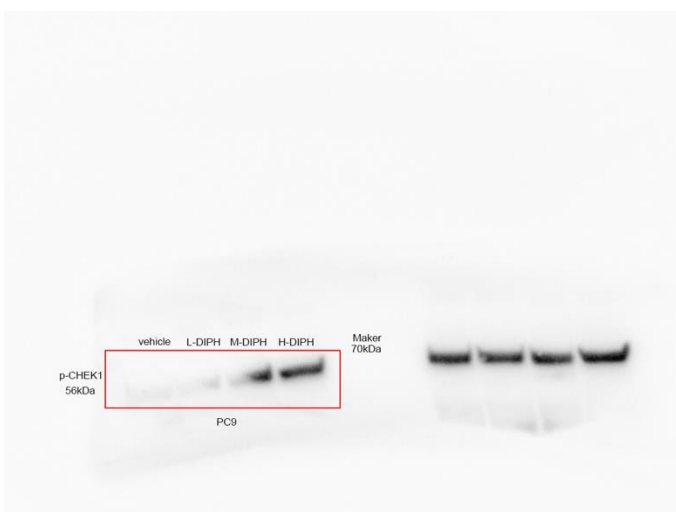

G

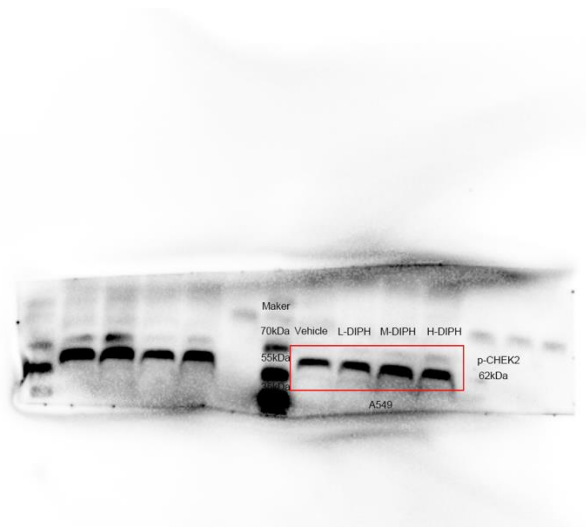

H

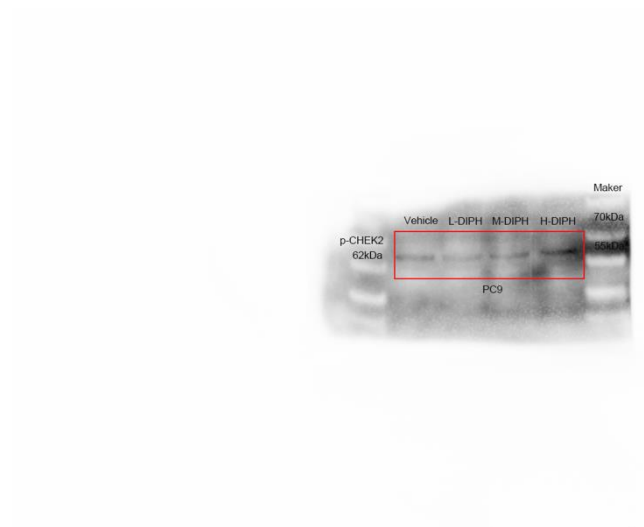

I

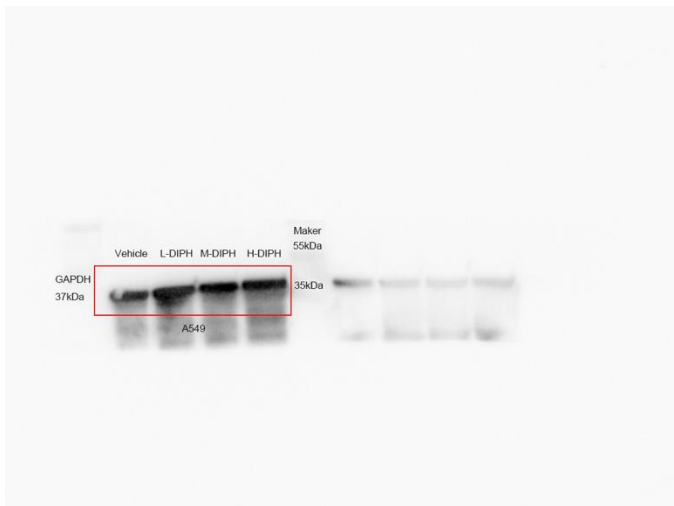

J

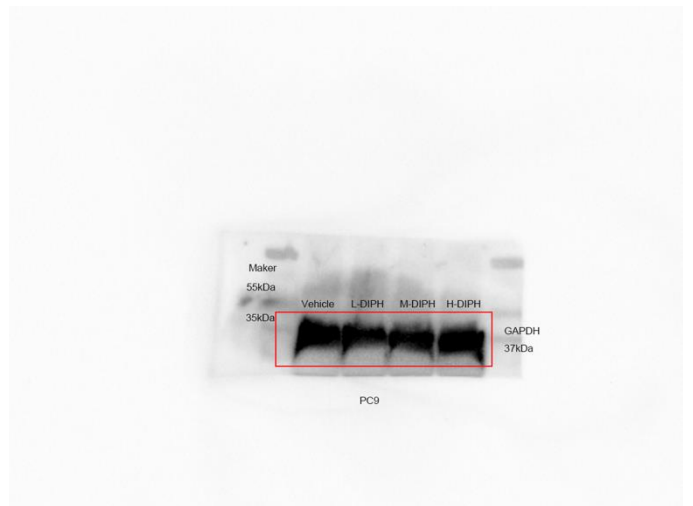

# Supplementary Figure 4

A

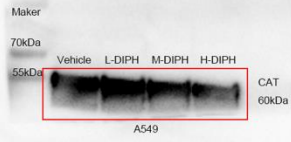

B

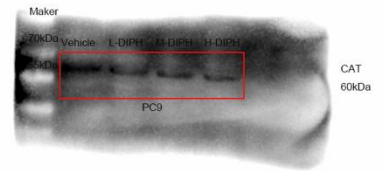

C

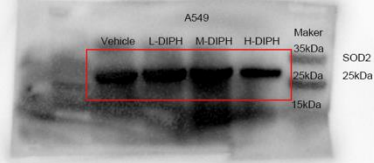

D

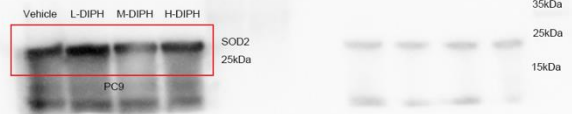

E

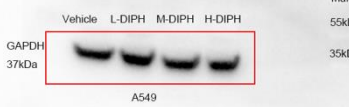

F

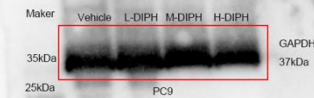

Supplement: Supplementary file 1 [file f9fa5cc9dc4814cf33c7016d.pdf]
